# Supplementary material for: Clinical significance of FBXO17 gene expression in high-grade glioma
Source: PubMed Central journal article supplement (PMC6069786; doi:10.1186/s12885-018-4680-3), 2018-07-31

Figure S1

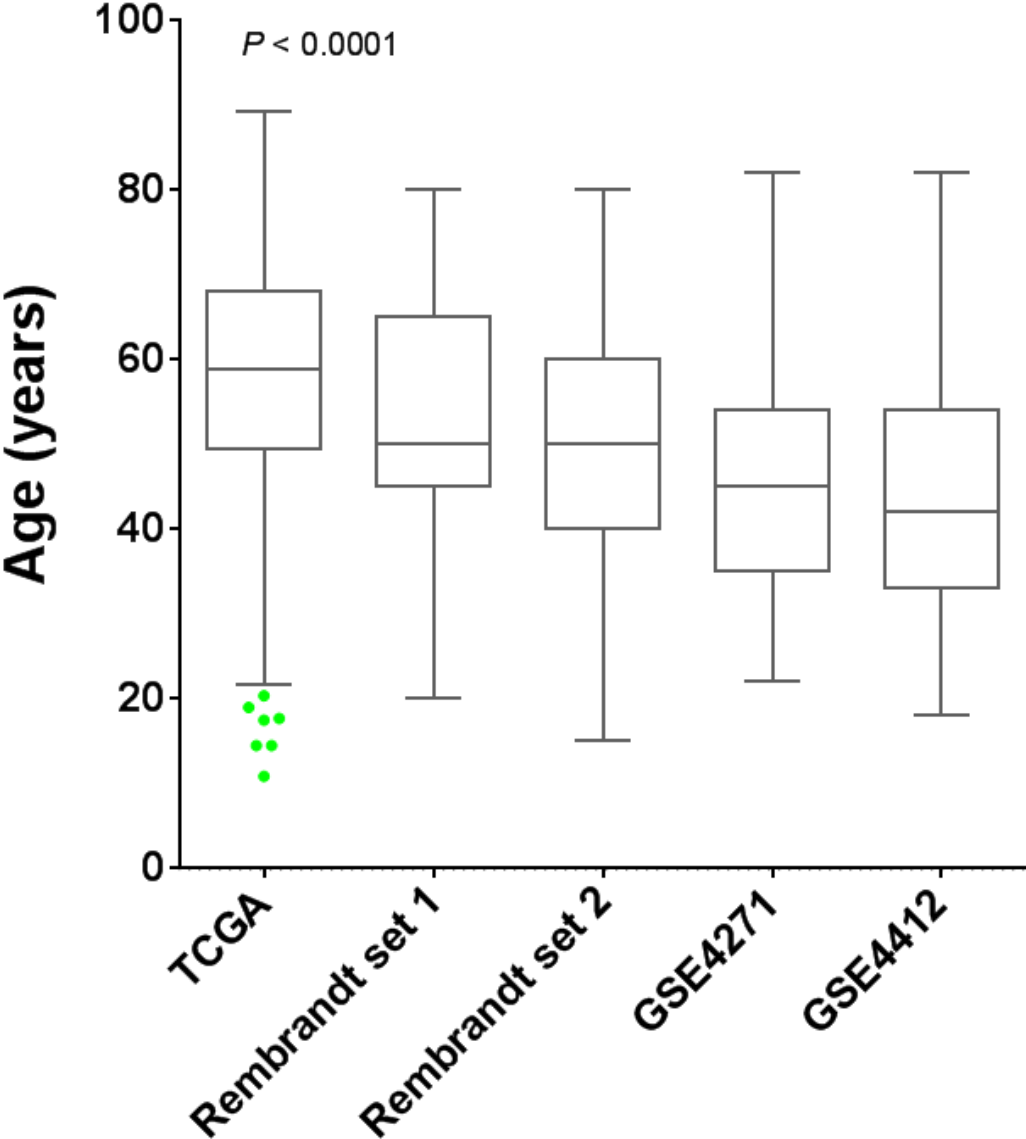

Supplement: 12885_2018_4680_MOESM1_ESM.pdf [file 12885_2018_4680_MOESM1_ESM.pdf]
